# Supplementary material for: Malaria rapid diagnostic test as point-of-care test: study protocol for evaluating the VIKIA® Malaria Ag Pf/Pan
Source: PubMed Central journal article supplement (PMC4389415; doi:10.1186/s12936-015-0633-3), 2015-03-14

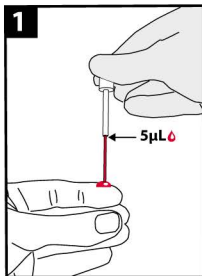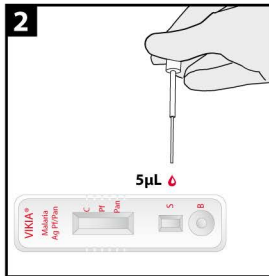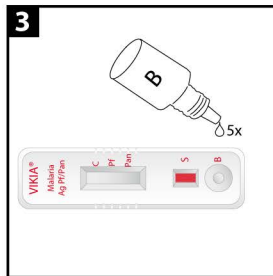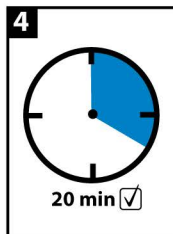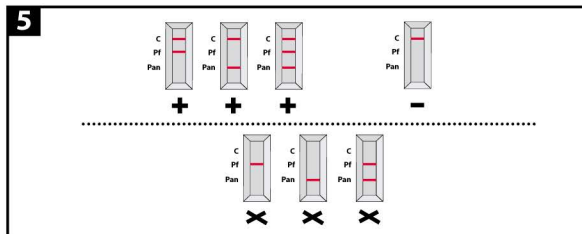

Supplement: 12936_2015_633_MOESM1_ESM.pdf [file 12936_2015_633_MOESM1_ESM.pdf]
